# Supplementary material for: Development of a one-pot assay for screening and identification of Mur pathway inhibitors in Mycobacterium tuberculosis
Source: PubMed Central journal article supplement (PMC5062083; doi:10.1038/srep35134), 2016-10-13
Supplement: srep35134-s1.pdf [file srep35134-s1.pdf]

# Development of a one-pot assay for screening and identification of Mur pathway inhibitors in *Mycobacterium tuberculosis*

Kandasamy Eniyan<sup>1</sup>, Anuradha Kumar<sup>2</sup>, Geetha Vani Rayasam<sup>2</sup>,  
Andrej Perdih<sup>3</sup> and Urmi Bajpai<sup>1\*</sup>

<sup>1</sup>Department of Biomedical Science, Acharya Narendra Dev College, University of Delhi, New Delhi 110019, India

<sup>2</sup>Open Source Drug Discovery Unit, CSIR, New Delhi 110002, India

<sup>3</sup>National Institute of Chemistry, Hajdrihova 19, 1001 Ljubljana, Slovenia

**\*Corresponding author**

**Urmi Bajpai, PhD**

Department of Biomedical Science,

Acharya Narendra Dev College,

University of Delhi

New Delhi 110019, India

[Email: urmibajpai@andc.du.ac.in](mailto:urmibajpai@andc.du.ac.in)

Ph. No. 011-26412547

Fax: 011-26294540

## Supplementary information

**Table S1.** Primers used in amplification of Mur enzymes

| Primer name | Primer DNA sequence                          | Restriction enzymes |
|-------------|----------------------------------------------|---------------------|
| MurA F      | 5'-ACCC <u>TGAATTC</u> ACTGACCGG-3'          | <i>EcoRI</i>        |
| MurA R      | 5'-AGGTAAGCTTCGCCTAACAGC-3'                  | <i>HindIII</i>      |
| MurB F      | 5'-ATTAG <u>AATTC</u> ATGAAACGGAGCGGTGTC-3'  | <i>EcoRI</i>        |
| MurB R      | 5'-GCCGCGAAAA <u>AAGCTT</u> CTACAAC-3'       | <i>Hind III</i>     |
| MurC F      | 5'-ATTAG <u>GATCC</u> GTGAGCACCGAGCAGTTG-3'  | <i>BamHI</i>        |
| MurC R      | 5'-TCTA <u>AAGCTT</u> CCTCGTTGTGTTCC-3'      | <i>Hind III</i>     |
| MurD F      | 5'-CGC <u>GATCC</u> GACGTGCTTGACCCTCTG-3'    | <i>BamHI</i>        |
| MurD R      | 5'-CGCA <u>AAGCTT</u> CTACCGGATCACCGCGCG-3'  | <i>Hind III</i>     |
| MurE F      | 5'-CGC <u>GATCC</u> GTGTCATCGCTGGCCCGAG-3'   | <i>BamHI</i>        |
| MurE R      | 5'-CGCA <u>AAGCTT</u> TCATGCGCGCCGCTCGAG-3'  | <i>Hind III</i>     |
| MurF F      | 5'-CGC <u>GATCC</u> ATGATCGAGCTGACCGTCGCG-3' | <i>BamHI</i>        |
| MurF R      | 5'-CGCA <u>AAGCTT</u> CATGGGCGCACACTCCC-3'   | <i>Hind III</i>     |

The underlined bases indicate the restriction sites.

**Table S2.** Results of the one-pot assay of the furan-based mono and dicarboxylic acid molecules against Mur Enzymes from *M.tuberculosis*.

| Compound | Structure                                                                           | Percentage inhibition (%) | Compound  | Structure                                                                             | Percentage inhibition (%) |
|----------|-------------------------------------------------------------------------------------|---------------------------|-----------|---------------------------------------------------------------------------------------|---------------------------|
| <b>1</b> | 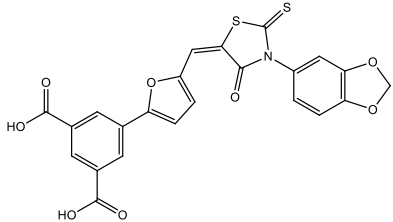   | 16                        | <b>6</b>  |    | 16                        |
| <b>2</b> |    | 18                        | <b>7</b>  |    | 10                        |
| <b>3</b> |   | 97                        | <b>8</b>  |   | 21                        |
| <b>4</b> |  | 93                        | <b>9</b>  |  | -1                        |
| <b>5</b> |  | 10                        | <b>10</b> |  | 28                        |

Inhibition in % were determined at 100  $\mu$ M concentration of the investigated compound.

**Table S3.** Results of the one-pot assay of the selected benzene-1,3-dicarboxylic acid 2,5-dimethylpyrrole derivatives against Mur Enzymes of *M.tuberculosis*.

| Compound | Structure                                                                           | Percentage inhibition | Compound | Structure                                                                             | Percentage inhibition |
|----------|-------------------------------------------------------------------------------------|-----------------------|----------|---------------------------------------------------------------------------------------|-----------------------|
| A        | 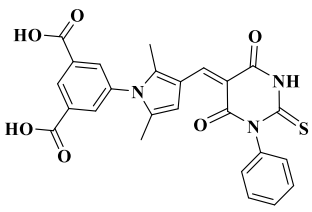   | 6                     | E        |     | 2                     |
| B        |    | 16                    | F        |    | 9                     |
| C        |   | 3                     | G        |   | 10                    |
| D        |  | 10                    | H        |  | 15                    |

Inhibition in % were determined at 250  $\mu$ M concentration of the investigated compound.

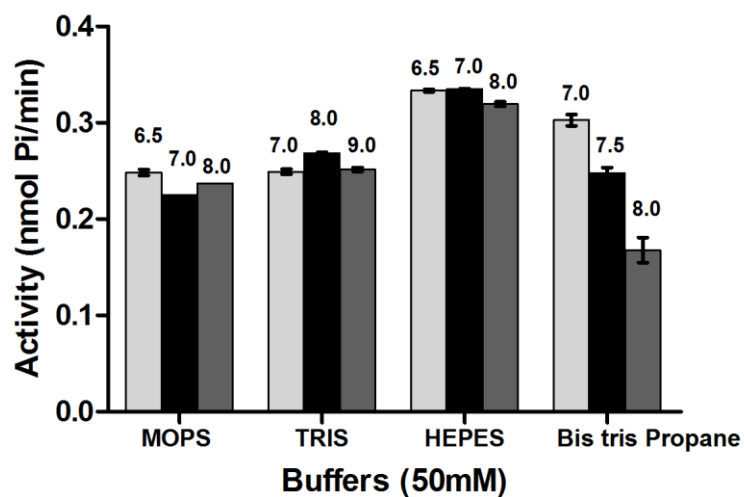

**Figure S1. Effect of various buffers on the UDP-N-acetylglucosamine enolpyruvyl transferase activity of MurA enzyme.** The pH of the buffers tested are mentioned above the bar. Net Pi released in enzymatic reactions was determined and data depicted is mean  $\pm$  S.E. values obtained from three independent experiments.

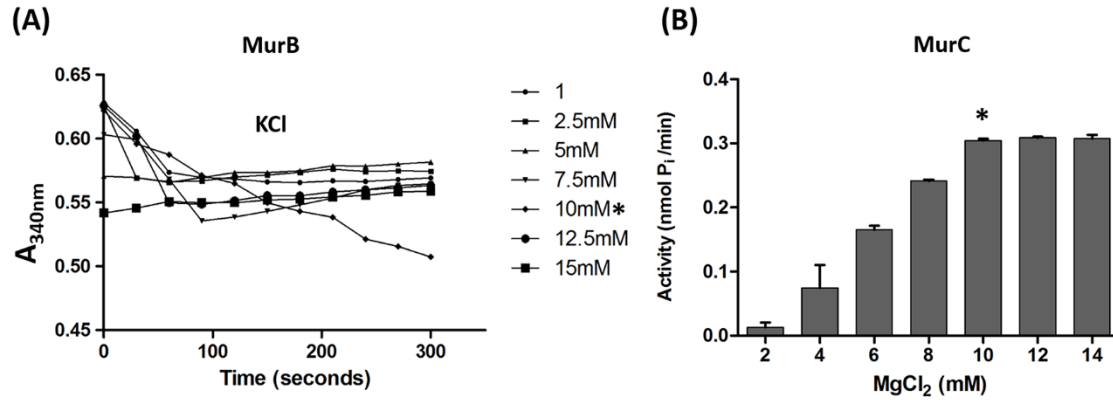

**Figure S2. Optimization of  $K^+$  and  $Mg^{2+}$  on MurB and MurC (first of the four ligases)** (A) Effect of  $K^+$  on the activity of MurB enzyme. X-axis represents incubation time (seconds) and Y-axis represents absorbance at 340nm and (B) Effect of  $Mg^{2+}$  on the ATPase activity of MurC enzyme. X-axis represents the  $MgCl_2$  at various concentrations (mM) and Y-axis represents the amount of  $P_i$  released (nmol/min). Net  $P_i$  released in enzymatic reactions was determined and data depicted is mean  $\pm$  S.E. values obtained from three independent experiments.

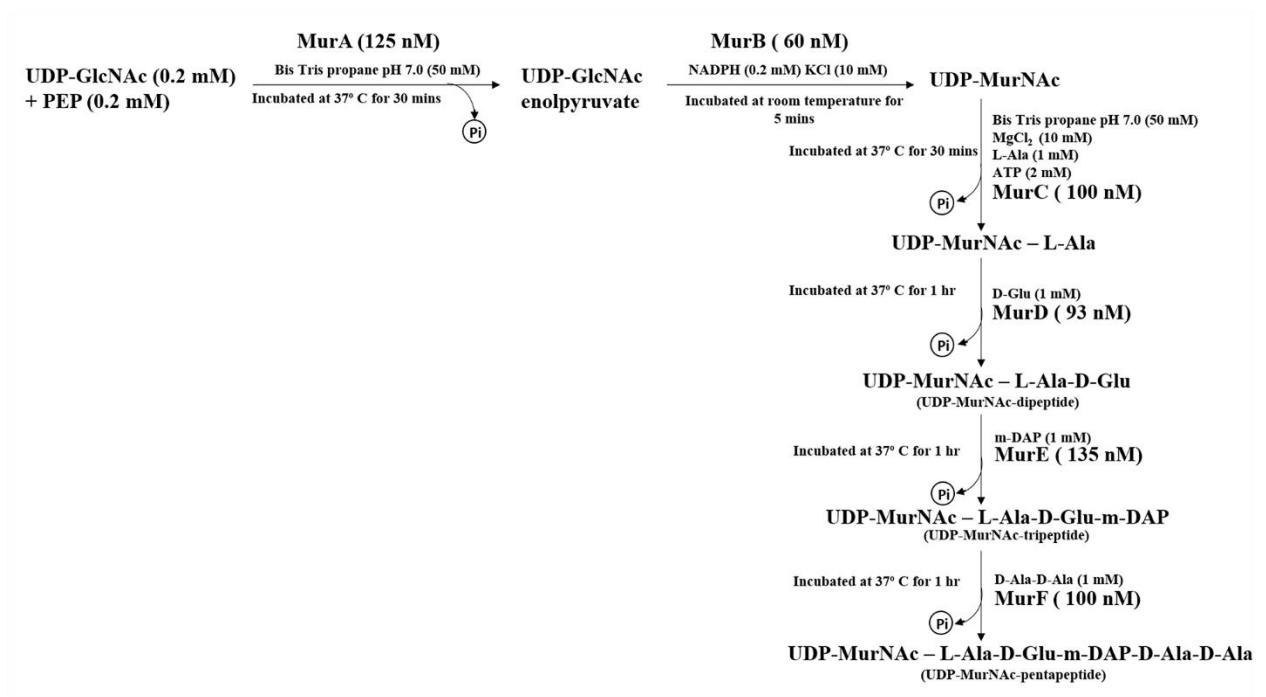

**Figure S3. Schematic representation of the sequential coupled assays.**

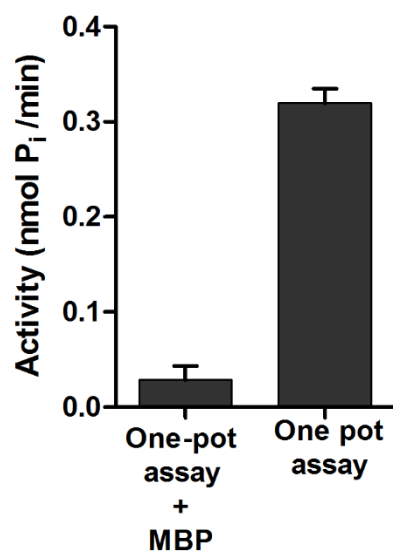

**Figure S4.** Effect of purified MBP in the one-pot assay. Purified MBP at 1 $\mu$ g concentration was added in place of MurD and MurF enzymes in the reaction mixture to demonstrate that the observed activity was specific to MurD and MurF. X-axis represents MBP added in one-pot assay and Y-axis represents net P<sub>i</sub> (nmol P<sub>i</sub>/min)



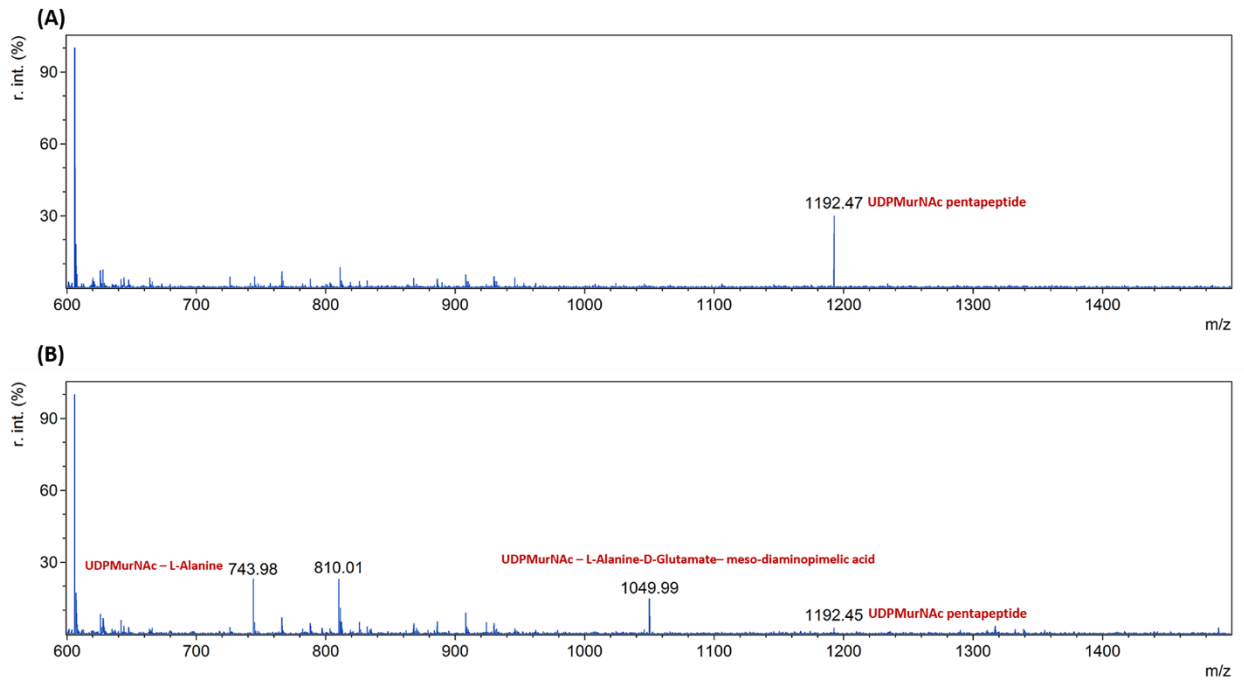

**Figure S5. Electron Spray Ionization-Mass Spectrometry analysis of D-Cycloserine activity in one-pot assay. (A)** ESI-MS analysis of one-pot assay without D-Cycloserine. **(B)** ESI-MS analysis of one-pot assay with D-Cycloserine.
